# Supplementary material
Source: publisher figshare collection journal article supplement (https://frontiersin.figshare.com/ndownloader/files/30792154)

**Supplementary Table 1** The demographic characteristics of the patients with early recurrence, late recurrence (postoperative recurrence after 12 months), and no recurrence

|                       | Early recurrence (%) | Late recurrence (%) | No recurrence (%) | <i>P</i> value |
|-----------------------|----------------------|---------------------|-------------------|----------------|
| Sex                   |                      |                     |                   | 0.564          |
| male                  | 20 (74.1%)           | 10 (58.8%)          | 25 (69.4%)        |                |
| female                | 7 (25.9%)            | 7 (41.2%)           | 11 (30.6%)        |                |
| Age (years)           |                      |                     |                   | 0.57           |
| <60                   | 16 (59.3%)           | 10 (58.8%)          | 17 (47.2%)        |                |
| ≥60                   | 11 (40.7%)           | 7 (41.2%)           | 19 (52.8%)        |                |
| Location              |                      |                     |                   | 0.002          |
| foregut               | 17 (63.0%)           | 15 (88.2%)          | 34 (94.4%)        |                |
| midgut                | 2 (7.4%)             | 2 (11.8%)           | 1 (2.8%)          |                |
| hindgut               | 8 (29.6%)            | 0 (0.0%)            | 1 (2.8%)          |                |
| Preoperative factors  |                      |                     |                   |                |
| PLR                   |                      |                     |                   | 0.036          |
| ≤174                  | 16 (59.3%)           | 16 (94.1%)          | 27 (75.0%)        |                |
| >174                  | 11 (40.7%)           | 1 (5.9%)            | 9 (25.0%)         |                |
| NLR                   |                      |                     |                   | 0.159          |
| ≤2.26                 | 10 (37.0%)           | 11 (64.7%)          | 20 (55.6%)        |                |
| >2.26                 | 17 (63.0%)           | 6 (35.3%)           | 16 (44.4%)        |                |
| ALP                   |                      |                     |                   | 0.017          |
| ≤80                   | 13 (48.1%)           | 14 (82.4%)          | 28 (77.8%)        |                |
| >80                   | 14 (51.9%)           | 3 (17.6%)           | 8 (22.2%)         |                |
| Tumor size (cm)       | 4.5±2.7              | 4.1±1.9             | 5.1±3.0           | 0.421          |
| WHO 2010              |                      |                     |                   | 0.353          |
| NEC                   | 20 (74.1%)           | 9 (52.9%)           | 23 (63.9%)        |                |
| MANEC                 | 7 (25.9%)            | 8 (47.1%)           | 13 (36.1%)        |                |
| pT stage              |                      |                     |                   | 0.388          |
| T1-T2                 | 3 (11.1%)            | 4 (23.5%)           | 9 (25.0%)         |                |
| T3-T4                 | 24 (88.9%)           | 13 (76.5%)          | 27 (75.0%)        |                |
| Lymph node metastasis |                      |                     |                   | 0.02           |
| Yes                   | 5 (18.5%)            | 3 (17.6%)           | 17 (47.2%)        |                |
| No                    | 22 (81.5%)           | 14 (82.4%)          | 19 (52.8%)        |                |
| LNR                   |                      |                     |                   | <0.001         |
| ≤0.25                 | 10 (37.0%)           | 12 (70.6%)          | 32 (88.9%)        |                |
| >0.25                 | 17 (63.0%)           | 5 (29.4%)           | 4 (11.1%)         |                |
| TNM stage             |                      |                     |                   | 0.023          |
| I-II                  | 2 (7.4%)             | 3 (17.6%)           | 13 (36.1%)        |                |
| III                   | 25 (92.6%)           | 14 (82.4%)          | 23 (63.9%)        |                |
| Ki-67                 |                      |                     |                   | 0.358          |
| ≥80%                  | 16 (59.3%)           | 12 (70.6%)          | 18 (50.0%)        |                |
| <80%                  | 11 (40.7%)           | 5 (29.4%)           | 18 (50.0%)        |                |
| Adjuvant chemotherapy |                      |                     |                   | 0.386          |

|                                |            |            |            |       |
|--------------------------------|------------|------------|------------|-------|
| No                             | 13 (48.1%) | 6 (35.3%)  | 20 (55.6%) | 0.044 |
| Yes                            | 14 (51.9%) | 11 (64.7%) | 16 (44.4%) |       |
| Adjuvant chemotherapy regimens |            |            |            |       |
| No                             | 13 (48.1%) | 6 (35.3%)  | 20 (55.6%) | 0.044 |
| Platinum-containing regimens   | 9 (33.3%)  | 10 (58.8%) | 16 (44.4%) |       |
| Other regimens                 | 5 (18.5%)  | 1 (5.9%)   | 0 (0.0%)   |       |

---

**Supplementary Fig 1** Kaplan-Meier analyses of GI-PDNEN patients with early recurrence, late recurrence (postoperative recurrence after 12 months), and no recurrence

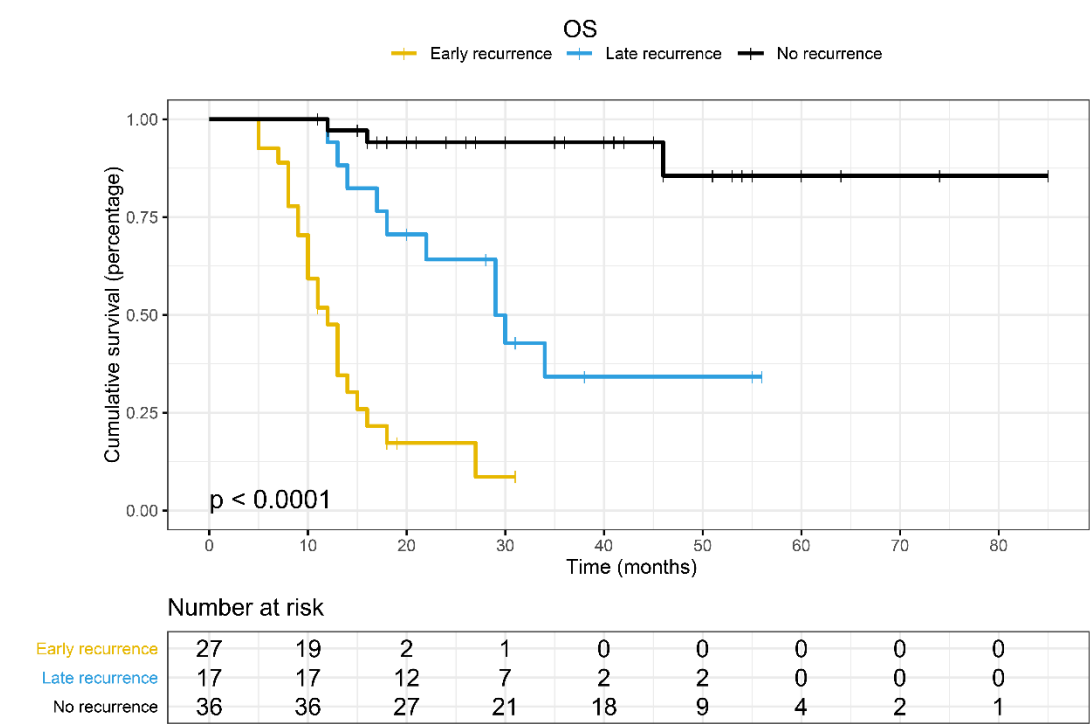

Supplement: Supplementary file [file 30792154]
